# Supplementary material for: Investigation of the growth mechanism of the formation of ZnO nanorods by thermal decomposition of zinc acetate and their field emission properties
Source: Royal Society of Chemistry journal article supplement (doi:10.1039/c7ce00073a), 2017-01-01
Supplement: c7ce00073a1.pdf [file c7ce00073a1.pdf]

### Supplementary Information

#### Investigation of growth mechanism of ZnO nanorods formation by thermal decomposition of zinc acetate and their field emission properties

Table S1 - Comparison of different zinc precursors on the basis of their decomposition temperature and cost

| Zinc precursor           | Decomposition temp (° C) | Cost       |
|--------------------------|--------------------------|------------|
| Zinc sulphate hydrate    | 800                      | 2500/250G* |
| Zinc oxalate hydrate     | 350-450                  | 7238/5G*   |
| Zinc nitrate hexahydrate | 400                      | 2248/500G* |
| Zinc acetate dehydrate   | 300                      | 1807/500G* |

\* Cost is based on Sigma Aldrich

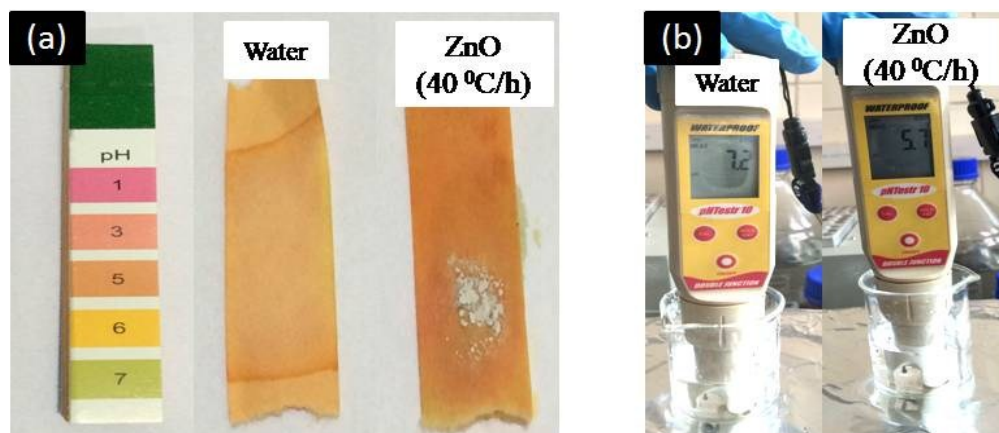

Fig. S1 – Variation in pH while decomposition of zinc acetate at heating rate of 40°C/h (a) over a pH strip and (b) on a digital pH-meter.
